# Supplementary material for: Organizational Support for Nurses' Career Planning and Development: A Scoping Review
Source: J Nurs Manag. 2024 Apr 26;2024:8296762. doi: 10.1155/2024/8296762 (PMC11918694; doi:10.1155/2024/8296762)
Supplement: Supplementary Materials — Supplementary File 1: Prisma-ScR Checklist. Supplementary File 2: the search terms used. Supplementary File 3: quality appraisal of studies. [file 8296762.f1.zip]

Archive with 3 entries (3 files):
- Supplementary file 1 (Checklist).pdf
- Supplementary file 2.docx
- Supplementary file 3.docx
